# Supplementary material for: Porous Silicone Rubber Composite Supported 1,4-Diphenylethynyl Benzene for Hydrogen Absorption with Pd/C Catalyst
Source: MDPI journal article supplement (doi:10.3390/ma17081921), 2024-04-22
Supplement: s1 [file s1]

Supporting Information:

## **Porous Silicone Rubber Composite Supported 1,4-Diphenylethynyl Benzene for Hydrogen Absorption with Pd/C Catalyst**

Yu Wang <sup>1</sup>, Tao Xing <sup>2,\*</sup>, and Lifeng Yan <sup>1,\*</sup>

<sup>1</sup> Department of Chemical Physics, University of Science and Technology of  
China, Hefei 230026, China; [wy1998@mail.ustc.edu.cn](mailto:wy1998@mail.ustc.edu.cn) (Y.Wang); and

[lfyan@ustc.edu.cn](mailto:lfyan@ustc.edu.cn) (L. Yan)

<sup>2</sup> Institute of System and Engineering, China Academy of Engineering Physics, 64

Mianshan Road, Mianyang 621900, China; [412xingt@caep.cn](mailto:412xingt@caep.cn)

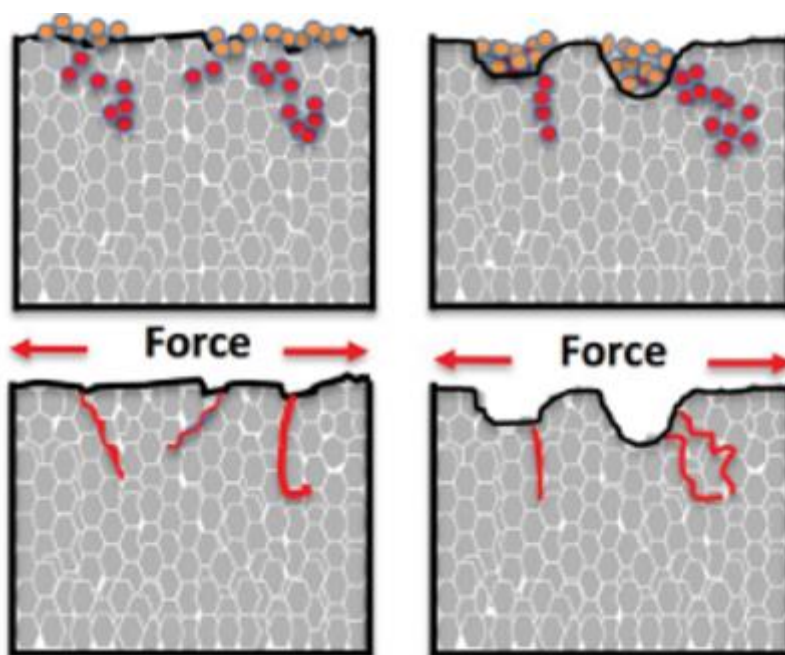

Figure S1. Mechanism of hydrogen corrosion of materials.

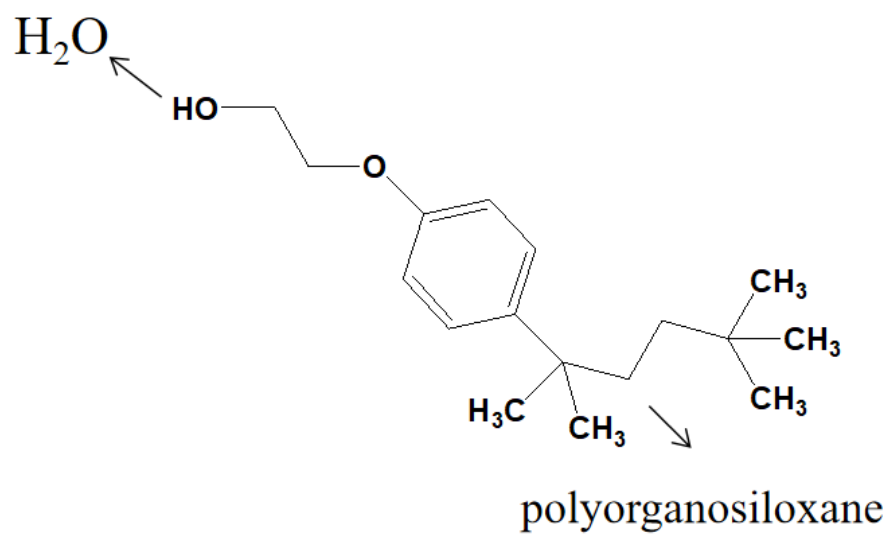

Figure S2. Structural formula of triton X-100.

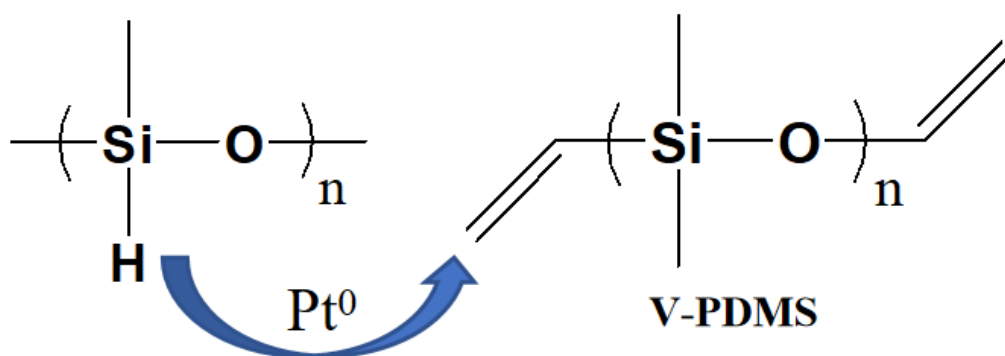

Figure S3. Mechanism of hydrosilylation.
